# Supplementary material for: Measuring the Interprofessional Health of the Pediatric Cardiovascular Operating Room Work Environment
Source: PubMed Central journal article supplement (PMC11167224; doi:10.1097/pq9.0000000000000737), 2024-06-11

Supplemental Digital Content 1. AACN Standard for Establishing and Sustaining Healthy Work Environments

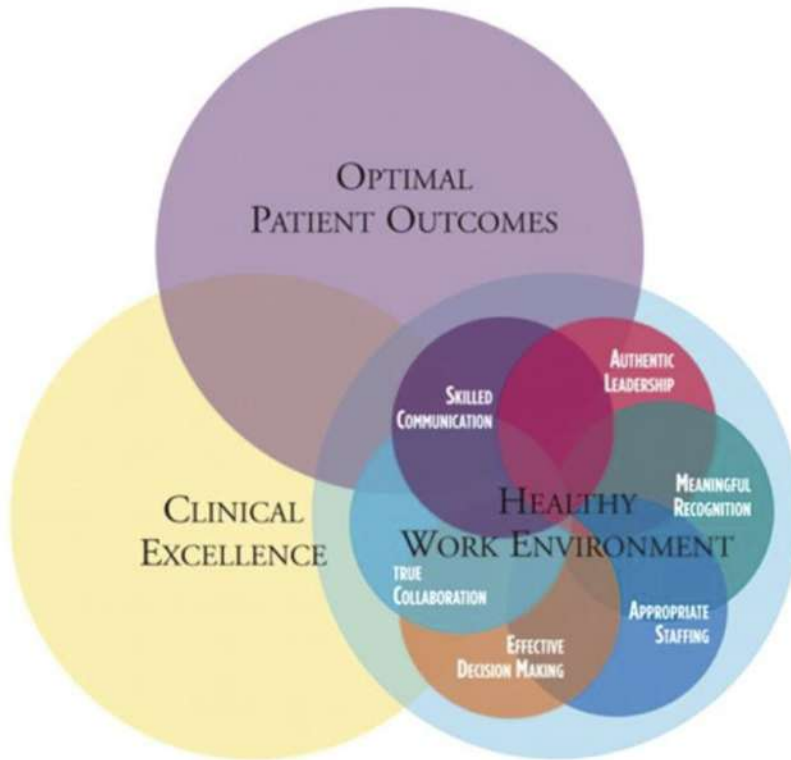

Supplement: pqs-9-e737-s001.pdf [file pqs-9-e737-s001.pdf]
